# Supplementary material for: The de-ubiquitylating enzymes USP26 and USP37 regulate homologous recombination by counteracting RAP80
Source: PubMed Central journal article supplement (PMC4538816; doi:10.1093/nar/gkv613), 2015-06-22
Supplement: supp_gkv613_nar-00131-d-2015-File009.pdf [file supp_gkv613_nar-00131-d-2015-File009.pdf]

## Supplemental Figure Legends

### **Supplemental Figure 1. A DUB over-expression screen reveals novel**

**DSB response regulators.** (A) List of the FLAG-tagged DUBs expressed in U2OS cells. Enzymes are color-coded to signify the different DUB families. In yellow Ubiquitin C-terminal Hydrolases (UCH), in green Machado-Josephin domain-containing proteins (MJD), in blue JAMM metalloproteases (JAMM), in red Otubain domain-containing proteins (OTU), in purple unclassified DUBs and in grey Ubiquitin Specific Proteases (USP). (B) Quantification of 53BP1 IRIF formation upon over-expression of the indicated DUBs. Red bars signify hits, i.e. population of cells with >5 53BP1 IRIFs is lower than 15% of total transfected cells. (C) Quantification of RAD51 IRIF formation upon over-expression of the indicated DUBs. Red bars signify hits, i.e. population of cells with >10 RAD51 IRIFs is lower than 15% of total transfected cells. (D) Examples of the impact of the over-expression of the indicated (non-) hits/DUBs (green) on 53BP1 IRIF formation (white). (E) Examples of the impact of the over-expression of the indicated (non-) hits/DUBs (green) on RAD51 IRIF formation (white).

### **Supplemental Figure 2. USP26 and USP37 accumulate at DSBs and**

**regulate chromatin ubiquitylation.** (A) Quantification of the impact of the expression of GFP- or mCherry-tagged DUBs (green or red) on  $\gamma$ H2AX, MDC1, FLAG-RNF8 IRIF formation. (B) As in A, except that RNF168, FK2, RAP80 and BRCA1 IRIF formation was quantified. In addition, the effect of the expression of catalytically inactive mCherry-tagged DUBs on FK2 IRIF was determined. (C) Recruitment of mCherry-tagged DUBs (red) to  $\gamma$ H2AX-

marked DNA damage sites (green) after UV-A laser micro-irradiation. (D) Quantification of the effect of the expression of GFP-tagged DUBs (green) on the formation of ubiquitylated substrates (FK2; white) upon chromatin tethering of mCherry-RNF168 (red). (E) As in D, but for 53BP1 (white). (F) Western blot analysis of ubiquitylation levels upon expression of the indicated mCherry-tagged DUBs. Blots were probed for unmodified and ubiquitylated H2B, as well as for mCherry and K48-, K63- and total (FK2)-ubiquitin. ns=non-significant, \*,  $P < 0.05$ , \*\*,  $P < 0.01$ , \*\*\*,  $P < 0.001$  (student's t test). Quantified data are represented as mean  $\pm$  S.D. (n=3).

**Supplemental Figure 3. USP26 and USP37 have non-redundant roles in the DSB response.** (A) Relative USP26 mRNA expression in U2OS cells treated with the indicated siRNAs. The USP26 transcript was not detectable (ND) by reverse transcriptase (RT)-qPCR in cells treated with siRNAs against USP26 (left panel). Representative agarose gel showing USP26 PCR product amplified from total RNA without (-RT) or with (+RT) reverse transcriptase reaction (right panel). (B) Relative USP37 mRNA expression in U2OS cells treated with the indicated siRNAs (lower panel). Relative endogenous USP37 protein expression in VH10-SV40 immortalized fibroblasts or U2OS cells treated with the indicated siRNAs. Tubulin is a loading control (upper panels). (C) Effect of DUB depletion on 53BP1 IRIF formation in time after 2 Gy of IR. (D) Effect of single- or double-DUB depletion on 53BP1 IRIF after 2 Gy of IR. (E) FACS plot of the engineered U2OS cells stably expressing mAG-geminin. The y-axis represents mAG (green) fluorescence intensity, while the x-axis shows DNA content. Different cell-cycle stages are indicated by vertical lines.

(F) Impact of single- or double-DUB depletion on HR efficiency measured using the DR-GFP reporter. ns=non-significant, \*, P<0.05, \*\*, P<0.01, \*\*\*, P<0.001 (student's t test). Quantified data are represented as mean  $\pm$  S.D. (n=3).

**Supplemental Figure 4. Loss of USP26 or USP37 affects the DSB response, but not cell cycle progression.** (A) Cell cycle profiles of cells treated with the indicated siRNAs. (B) Cell cycle profiles of cells over-expressing the indicated GFP fusion proteins. (C) Effect of combined DUB depletion on DSB repair, assayed by clearance of  $\gamma$ H2AX foci after 2 Gy of IR. (D) Effect of DUB and RAP80 depletion on RAP80 IRIF formation. (E) Impact of DUB depletion on the relative position/expansion of the indicated factors (FK2 or 53BP1; green) upon DSB-induction by FokI-mCherry-LacR (red). (F) Cell cycle profiles of cells treated with the indicated siRNAs. (G) BRCA1-PALB2-BRCA2-RAD51- (BRCC) and BRCA1-Abraxas-RAP80-MERIT40- (BRCA1-A) complexes are distinct, as observed upon immunoprecipitation (IP) of endogenous PALB2 or RAP80. Blots were probed for endogenous BRCA1, PALB2, RAP80, BRCC36, RAD51 and H2AX. ns=non-significant, \*, P<0.05, \*\*, P<0.01, \*\*\*, P<0.001 (student's t test). Quantified data are represented as mean  $\pm$  S.D. (n=3), except in (D) and (E) where mean  $\pm$  S.E.M. (n=2) is shown.

**A**

| UCH   | MJD   | JAMM     | OTU    | Unclassified | USP   |       |       |       |       |
|-------|-------|----------|--------|--------------|-------|-------|-------|-------|-------|
| UCHL1 | JOSD1 | STAMPB   | OTUB1  | PARP11       | USP1  | USP2  | USP30 | USP43 | USP52 |
| UCHL3 | JOSD2 | STAMBPL1 | OTUB2  | PSMD7        | USP10 | USP21 | USP33 | USP44 | USP53 |
| BAP1  | JOSD3 | BRCC36   | OTUD4  | PSMD14       | USP11 | USP22 | USP36 | USP45 | USP7  |
|       | ATXN3 | EIF3S3   | OTUD5  | VCPIP1       | USP13 | USP25 | USP37 | USP46 | USP8  |
|       |       | EIF3S5   | OTUD6B |              | USP14 | USP26 | USP38 | USP48 | USPL1 |
|       |       | COPS5    | OTUD7B |              | USP15 | USP28 | USP39 | USP49 | DUB3  |
|       |       | COPS6    |        |              | USP18 | USP29 | USP4  | USP5  | CYLD  |
|       |       |          |        |              | USP19 | USP3  | USP42 | USP50 |       |

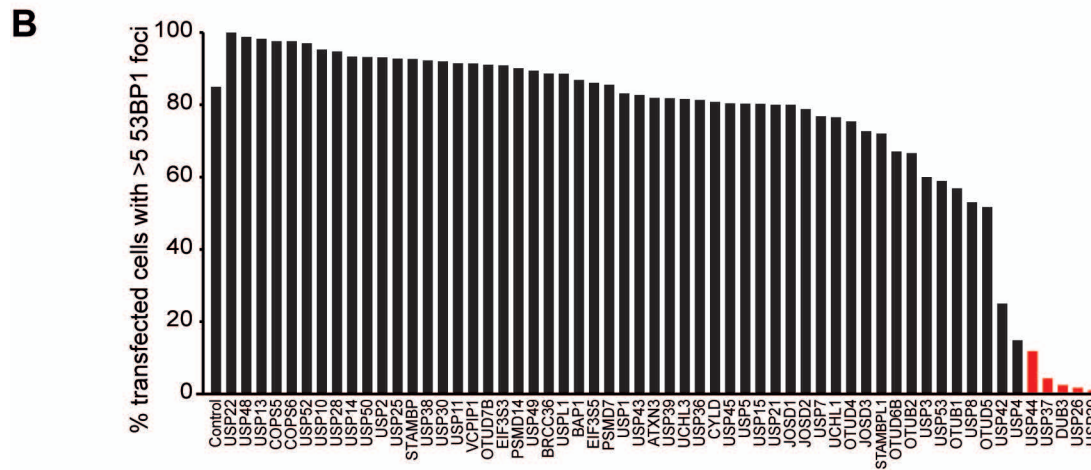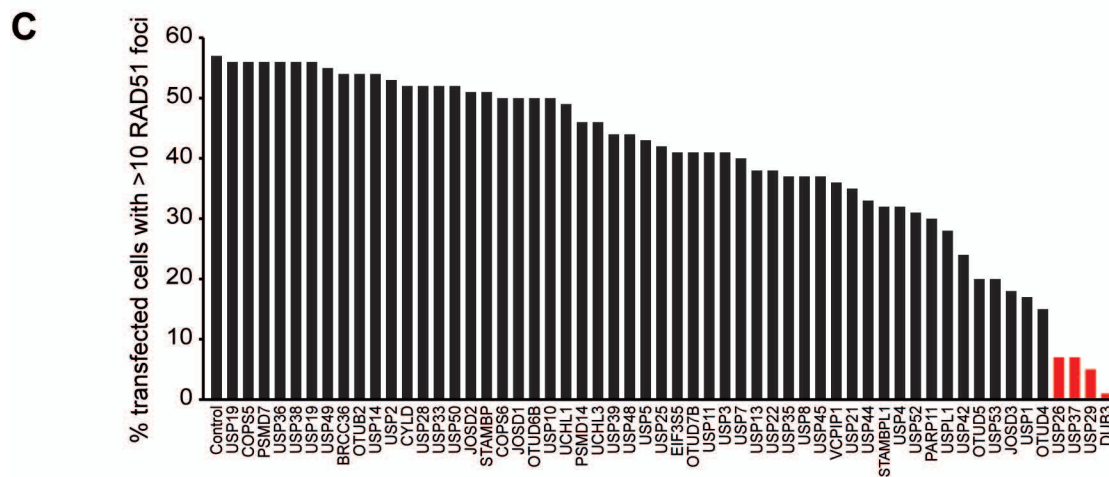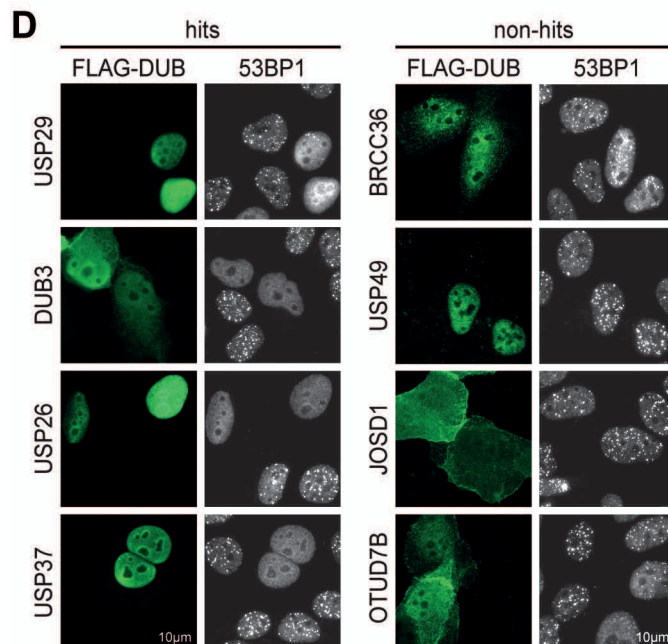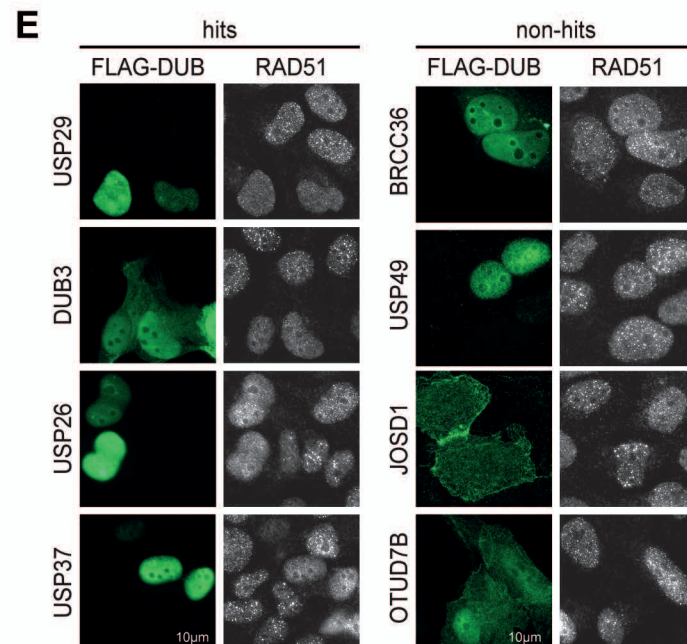

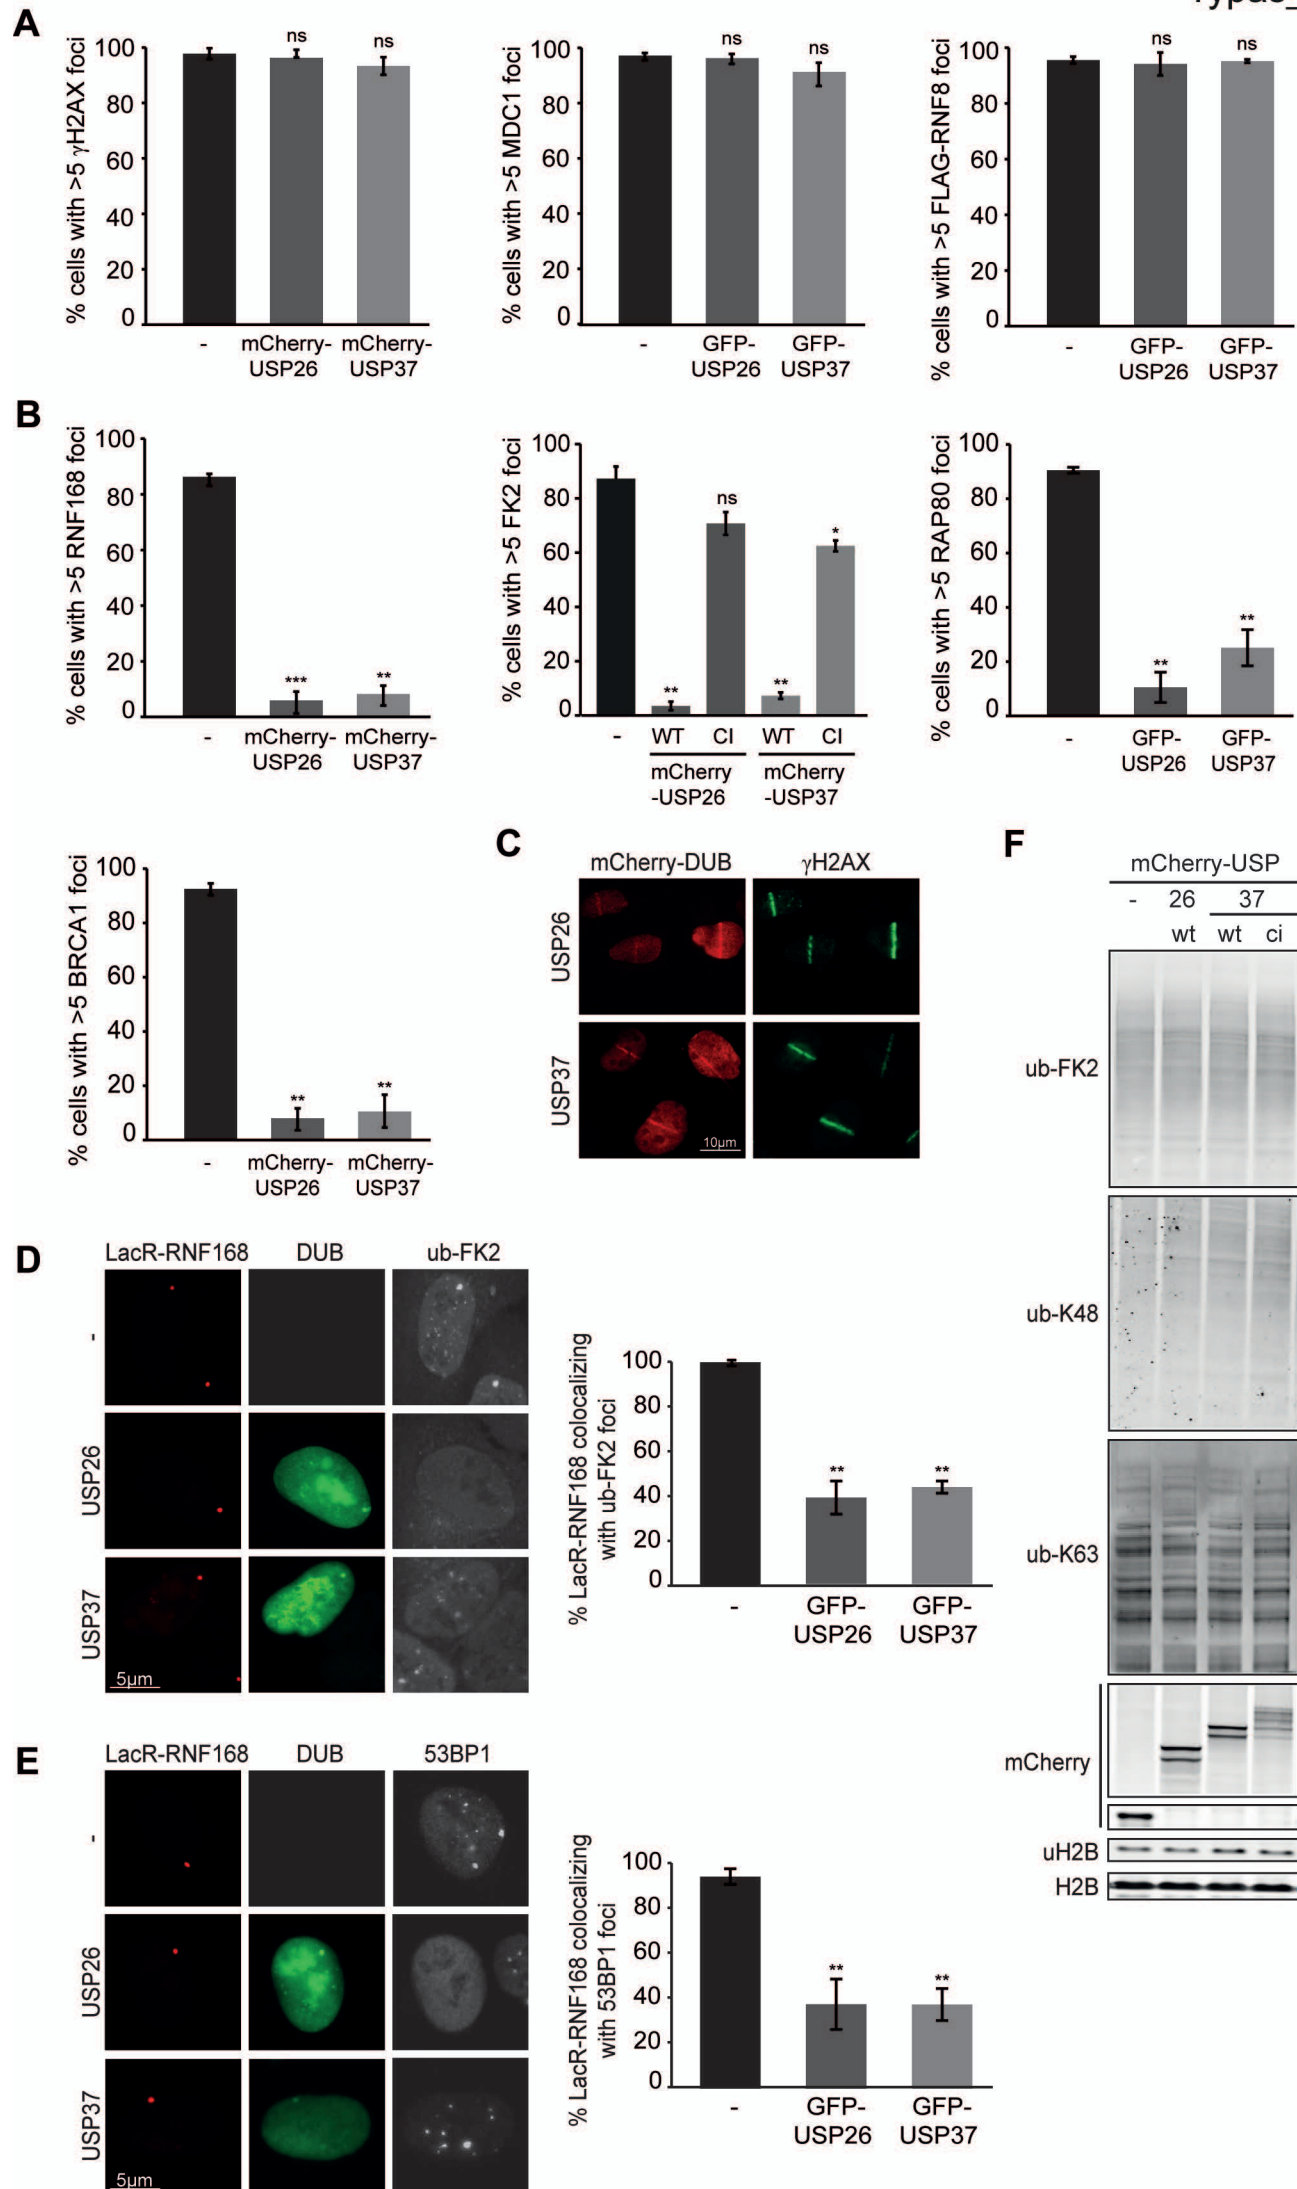

Typas\_Suppl\_Fig.3

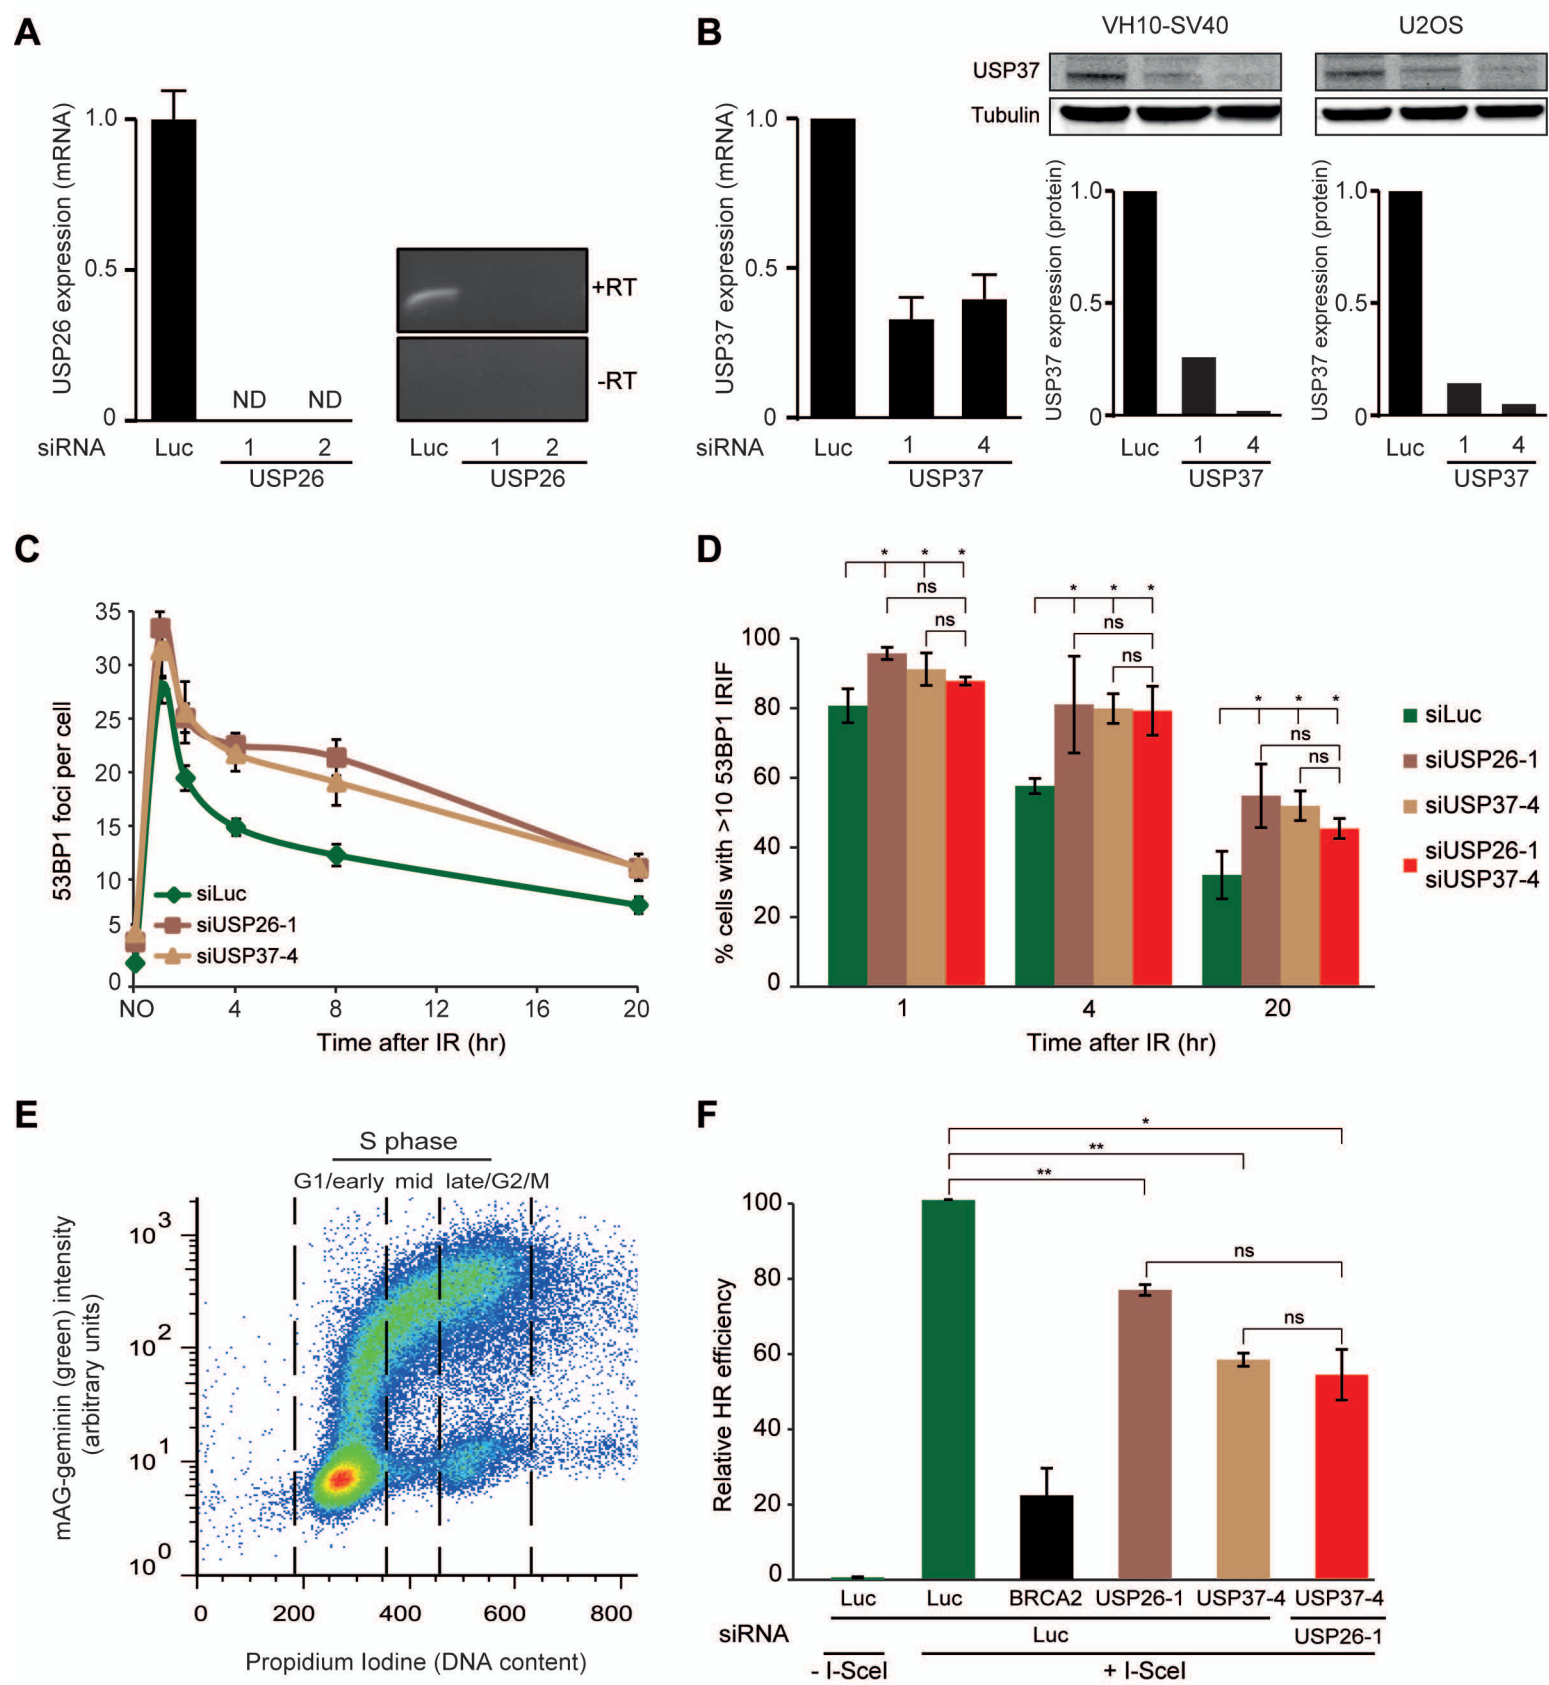

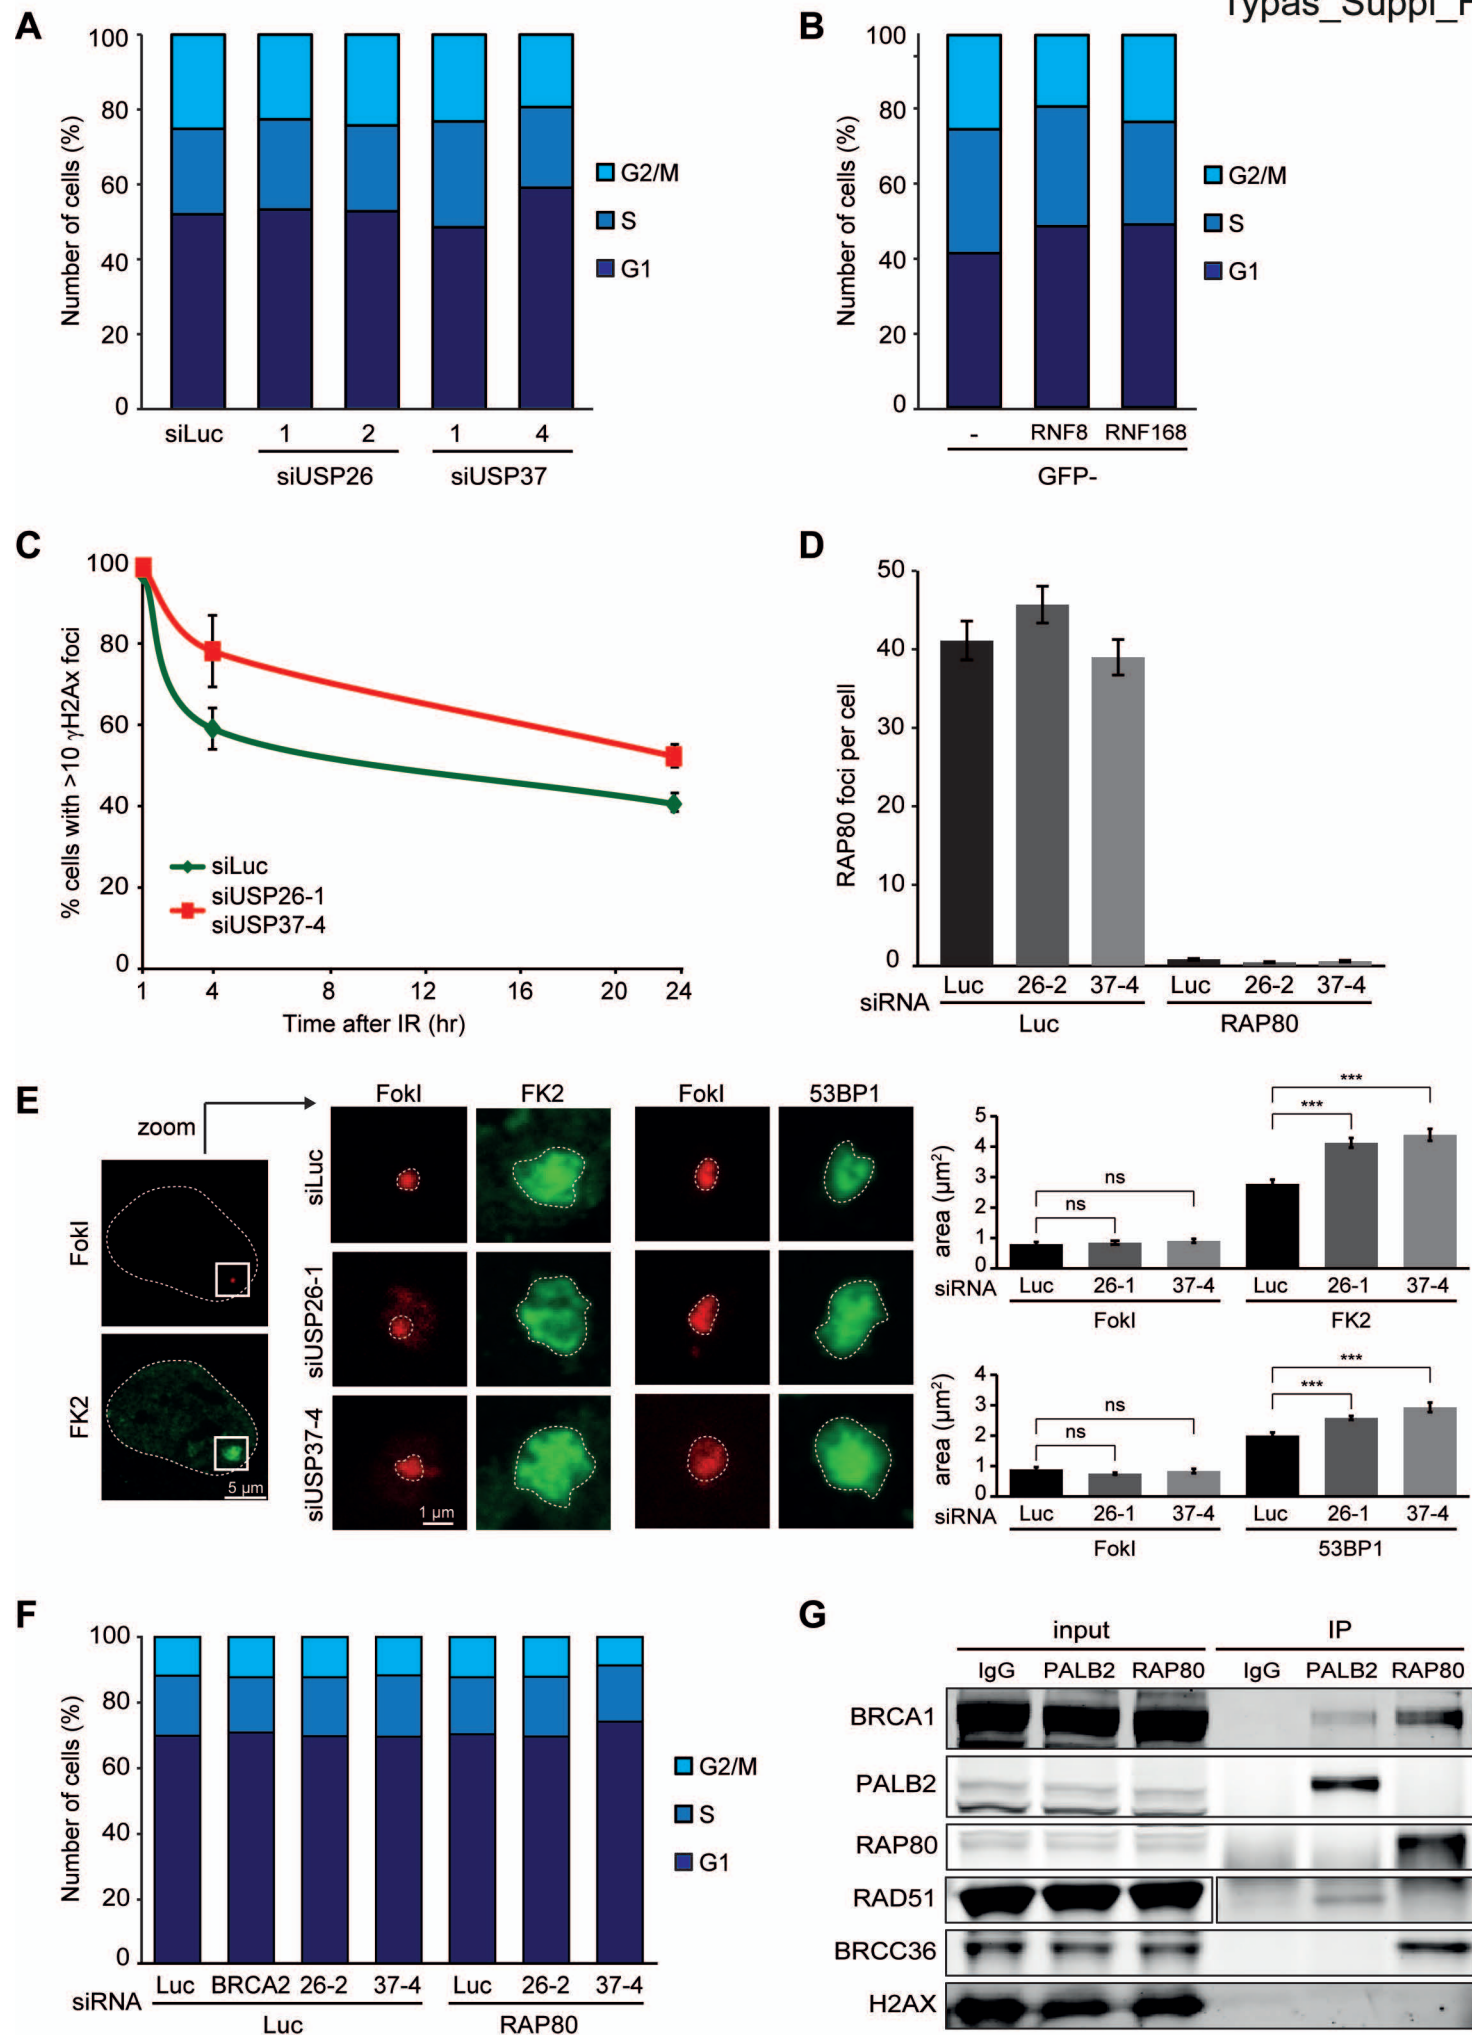

## Supplemental Table

| Antibodies             |                                                                                         |                                                                                        |                 |        |         |
|------------------------|-----------------------------------------------------------------------------------------|----------------------------------------------------------------------------------------|-----------------|--------|---------|
| Target protein         | Host                                                                                    | Obtained from                                                                          | Cat. nr.        | IF     | WB      |
| 53BP1                  | rabbit                                                                                  | Novus Biologicals                                                                      | NB100-304       | 1:2000 |         |
| BRCA1                  | mouse                                                                                   | SantaCruz                                                                              | sc-6954         | 1:100  |         |
| BRCA1                  | rabbit                                                                                  | gift Dr. Daniel Durocher                                                               |                 |        | 1:1000  |
| BRCC36                 | rabbit                                                                                  | Abcam                                                                                  | ab62075         |        | 1:1000  |
| FLAG                   | mouse                                                                                   | Sigma                                                                                  | F1804           | 1:1000 |         |
| GFP                    | rabbit                                                                                  | Abcam                                                                                  | ab290           |        | 1:1000  |
| GFP                    | mouse                                                                                   | Roche                                                                                  | #11814460001    |        | 1:2000  |
| γH2AX                  | mouse                                                                                   | Millipore                                                                              | JBW301          | 1:2000 |         |
| H2AX                   | rabbit                                                                                  | Bethyl                                                                                 | A330-082A       |        | 1:10000 |
| H2B                    | rabbit                                                                                  | Millipore                                                                              | 07-371          |        | 1:10000 |
| HA                     | mouse                                                                                   | SantaCruz                                                                              | sc-7392         | 1:500  |         |
| mCherry                | mouse                                                                                   | Abcam                                                                                  | ab125096        |        | 1:1000  |
| MDC1                   | rabbit                                                                                  | Abcam                                                                                  | ab11171         | 1:1000 |         |
| PALB2                  | rabbit                                                                                  | Bethyl                                                                                 | A301-246A       |        | 1:1000  |
| PALB2                  | rabbit                                                                                  | gift Dr. Bing Xia                                                                      |                 | 1:100  |         |
| RAD51                  | rabbit                                                                                  | SantaCruz                                                                              | sc-8349         | 1:100  |         |
| RNF168                 | rabbit                                                                                  | Millipore                                                                              | ABE367          | 1:200  | 1:500   |
| Tubulin                | mouse                                                                                   | Sigma                                                                                  | T6199           |        | 1:5000  |
| Ubiquitin K48 chains   | rabbit                                                                                  | Millipore                                                                              | APU2/05-1307    |        | 1:100   |
| Ubiquitin K63 chains   | rabbit                                                                                  | Millipore                                                                              | APU3/05-1308    |        | 1:1000  |
| Ubiquitin-FK2          | mouse                                                                                   | EnzoLifeSciences                                                                       | BML-PW8810-0500 | 1:100  |         |
| RPA                    | mouse                                                                                   | ThermoScientific                                                                       | Ab-1 9H8        | 1:1000 |         |
| CtIP                   | mouse                                                                                   | gift Dr. Richard Baer                                                                  |                 | 1:10   |         |
| RAP80                  | rabbit                                                                                  | Bethyl                                                                                 | A300-764        |        | 1:1000  |
| RAP80                  | rabbit                                                                                  | Bethyl                                                                                 | A300-763A       | 1:500  |         |
| Rabbit-700CW           | donkey                                                                                  | Licor                                                                                  |                 |        | 1:20000 |
| Mouse-800CW            | donkey                                                                                  | Licor                                                                                  |                 |        | 1:20000 |
| siRNAs                 |                                                                                         |                                                                                        |                 |        |         |
| Target Protein         | siRNA name                                                                              | Sequence (5'-3')                                                                       |                 |        |         |
| Luciferase             | Luc                                                                                     | CGUACGCGGAUACUUCGA                                                                     |                 |        |         |
| BRCA2                  | BRCA2                                                                                   | GAAGAAUGCAGGUUAAUA                                                                     |                 |        |         |
| RNF8                   | RNF8-1                                                                                  | GAGGGCCAAUGGACAAUUA                                                                    |                 |        |         |
| USP26                  | USP26-1                                                                                 | CCACAAAGCUGGAGGUAAA                                                                    |                 |        |         |
| USP26                  | USP26-2                                                                                 | CCACAAAGUUGAUGAGAAA                                                                    |                 |        |         |
| USP26                  | USP26-3                                                                                 | CAGAAGAGCTTGAGTATAA                                                                    |                 |        |         |
| USP37                  | USP37-1                                                                                 | CUACAAUACUGGAGGAAUU                                                                    |                 |        |         |
| USP37                  | USP37-4                                                                                 | GAAGAUUACCCUAAGGAAA                                                                    |                 |        |         |
| RAP80                  | RAP80<br>(Dharmacon<br>SMARTpool<br>L-006995-00-0005)                                   | GTAAATCCCTGGTCCATT<br>AAATGAATCTCCCCTCAAG<br>AGAGCAGGCTAGTGAGAAA<br>AGAGGCAGCTCCTAATAA |                 |        |         |
| qPCR primers           |                                                                                         |                                                                                        |                 |        |         |
| Target gene            | Gene/Primer                                                                             | Sequence (5'-3')                                                                       |                 |        |         |
| USP26                  | USP26-Forward                                                                           | AGTGTGTGCAGCCATCTTGG                                                                   |                 |        |         |
| USP26                  | USP26-Reverse                                                                           | CCCGCATATCATCGTAAGTG                                                                   |                 |        |         |
| USP37                  | USP37-Forward                                                                           | GCCCAAACAATCACAGAGC                                                                    |                 |        |         |
| USP37                  | USP37-Reverse                                                                           | TCCCTTTCACGCTCCATATC                                                                   |                 |        |         |
| Plasmids               |                                                                                         |                                                                                        |                 |        |         |
| Encoded fusion protein | Described in                                                                            |                                                                                        |                 |        |         |
| GFP-H2A                | Luijsterburg <i>et al. Journal of Cell Biology</i> <b>197</b> : 267-281 (2012)          |                                                                                        |                 |        |         |
| FokI-LacR-mCherry      | Tang <i>et al. Nature Structural &amp; Molecular Biology</i> <b>20</b> : 317-325 (2013) |                                                                                        |                 |        |         |
| mCherry-LacR-RNF168    | Luijsterburg <i>et al. EMBO Journal</i> <b>31</b> : 2511-2527(2012)                     |                                                                                        |                 |        |         |
| mCherry-LacR-RNF8      | Luijsterburg <i>et al. EMBO Journal</i> <b>31</b> : 2511-2527(2012)                     |                                                                                        |                 |        |         |
| mCherry-RNF168         | Smeenk <i>et al. Journal of Cell Science</i> <b>126</b> : 889-903 (2013)                |                                                                                        |                 |        |         |
| mCherry-RNF8           | Smeenk <i>et al. Journal of Cell Science</i> <b>126</b> : 889-903 (2013)                |                                                                                        |                 |        |         |
